# Supplementary material for: Anti-Obesity Effect of Nostoc commune Ethanol Extract In Vitro and In Vivo
Source: MDPI journal article supplement (doi:10.3390/nu14050968), 2022-02-24
Supplement: s1 [file s1]

**Supplementary Table S1.** Specific primer of real-time PCR analysis in this study.

| Gene<br>(rat)  | Primer sequence (5'-3')       | Reference<br>(NCBI GenBank) |
|----------------|-------------------------------|-----------------------------|
| $\beta$ -actin | F- AGGCCCTCTGAACCCTAAG        | NM031144.3                  |
|                | R- CAGCCTGGATGGCTACGTACA      |                             |
| PPAR- $\gamma$ | F- AAGTTTGAGTTTGCTGTGAAGTTC.A | NM001145366.1               |
|                | R- CGATGGGCTTCACGTTTCAG       |                             |
| SREBP-1c       | F- CGGGACAGCTTAGCCTCTACA      | NM001276707.1               |
|                | R- CGGCCACAAGAAGTAGATCA       |                             |
| HSL            | F-GTCACGCTACATAAAGGCTGCTT     | NM012598.1                  |
|                | R-CAGCCCGATGGAGAGAGTCT        |                             |
| ATGL           | F-GGCCACTGCCATGATGGTA         | NM001108509.2               |
|                | R-GCAGCCACTCCAACAAACG         |                             |
| AMPK           | F-GTGGATCGCCAAATTATGCA        | NM023991.1                  |
|                | R-AACCTCAGGACCCGCATACA        |                             |
| CPT-1          | F-CCACAAGGCTACAATGGGACAT      | NM031559.2                  |
|                | R-AAGGAATGCAGGTCCACATCA       |                             |
| PPAR- $\alpha$ | F-GCCCTCGAACTGGATGACA         | NM013196.1                  |
|                | R-CCCTCCTGCAACTTCTCAATG       |                             |

F: Forward primer. R: Reverse primer.
